# Supplementary material
Source: Springer Nature journal article supplement (https://www.springermedizin.de/resource/supplementary/12943_2011_998_MOESM6_ESM.PDF/9552040)
Supplement: MOESM6 [file 9552040]

**Additional file 6:**

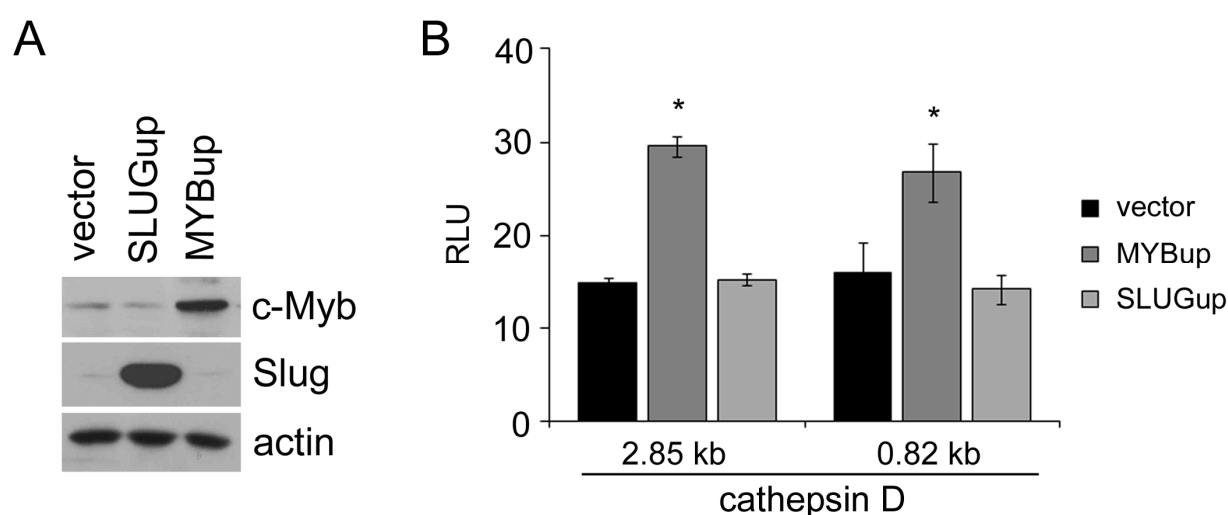

**Figure S6. c-Myb induces the *cathepsin D* transcription independently on Slug.** MDA-MB-231 cells were transiently cotransfected with either *c-myb* (MYBup), *Slug* cDNA (SLUGup) or the empty vector (vector) and the reporter plasmids (the 2.85 kb- or 0.82 kb pGL3-CD containing segments of *cathepsin D* promoter of indicated lengths upstream of the *luciferase* gene, and CMV- $\beta$ gal) and harvested 48 h later. **(A)** The amounts of c-Myb and Slug proteins were determined by immunoblotting. **(B)** The luciferase activity of each sample was expressed in relative light units and normalized for transfection efficiency according to the  $\beta$ -galactosidase activity. The columns show the average relative luciferase activity from three independent measurements. Error bars indicate the standard deviations. Asterisks indicate significant ( $p < 0.05$ ) differences in the luciferase activity in the empty vector-transfected cells and cells transfected with *c-myb* cDNA as determined by the *t*-test.
